# Supplementary material
Source: publisher figshare collection journal article supplement (https://acs.figshare.com/ndownloader/files/3887779)
Supplement: Supplementary file 1 [file 3887779]

# Nanostructured Porous Si Optical Biosensors: Effect of Thermal Oxidation on Their Performance and Properties

*Giorgi Shtenberg<sup>1</sup>, Naama Massad-Ivanir<sup>2</sup>, Ljiljana Fruk<sup>3</sup> and Ester Segal<sup>2,4\*</sup>*

<sup>1</sup>The Inter-Departmental Program of Biotechnology, <sup>2</sup>Department of Biotechnology and Food Engineering, Technion – Israel Institute of Technology, Haifa 32000, Israel

<sup>3</sup>Karlsruhe Institute of Technology, DFG – Center for Functional Nanostructures, Karlsruhe 76131, Germany

<sup>4</sup>The Russell Berrie Nanotechnology Institute, Technion – Israel Institute of Technology, Haifa 32000, Israel

## **Corresponding Author**

\*E-mail: [esegal@tx.technion.ac.il](mailto:esegal@tx.technion.ac.il)

Tel: +972-4-8295071. Fax: +972-4-8293399.

Freshly etched PSi nanostructures are *in situ* thermally oxidized at three temperatures (400, 600, and 800°C) in a TGA (thermal gravimetric analyzer). Figure S1 depicts the weight change of the PSi following oxidation. Oxide layer growth onto the PSi scaffolds is observed to result in a weight increase at elevated oxidation temperatures. For PSi oxidized at 800°C the highest weight change ( $0.19\pm0.01\%$ ) is obtained.

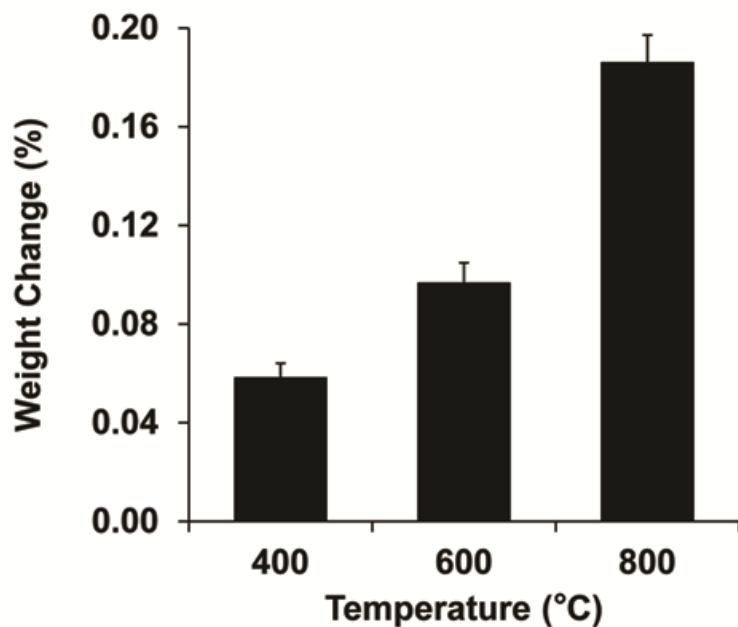

**Figure S1.** Weight change of PSi scaffolds following *in situ* thermal oxidization (at 400, 600, and 800°C) in a TGA.

The oxidation process is characterized by using attenuated total reflectance Fourier transform infrared (ATR-FTIR) spectroscopy. Figure S2 depicts the ATR-FTIR spectra of the different surfaces oxidized at 400, 600 and 800°C. The absorbance of Si-O-Si stretching mode,  $-(O_ySiH_x)$  and Si-OH vibration modes are significantly increased with elevating the oxidation temperature, while the Si-H<sub>x</sub> peak is observed to completely disappear.

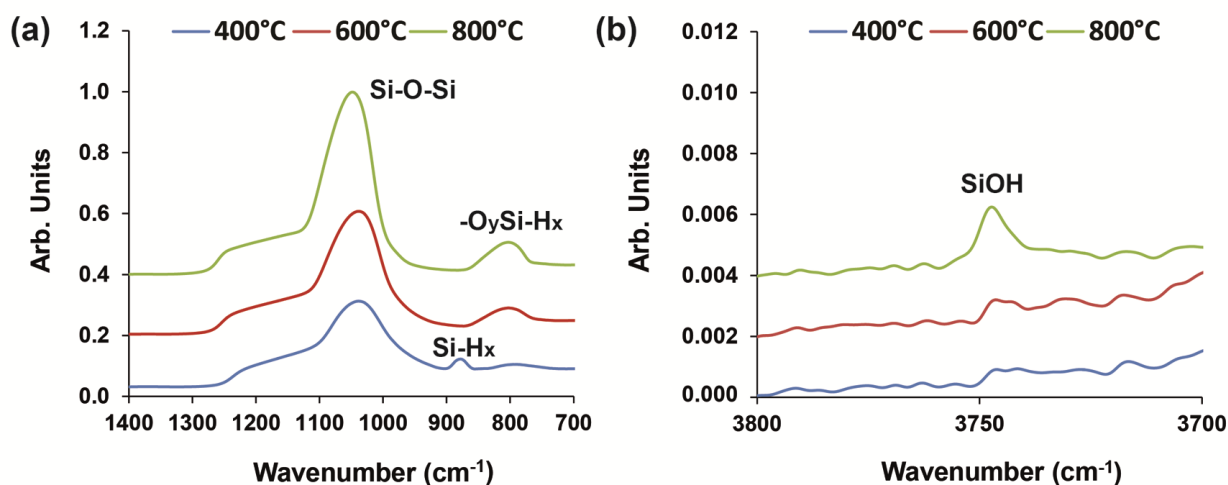

**Figure S2.** ATR-FTIR spectra of PSi films oxidized at different temperatures (400, 600, 800°C). Oxidation process is characterized by monitoring: **(a)** Si-O-Si,  $-(O_ySiH_x)$  and Si-H<sub>x</sub> peaks. **(b)** Si-OH vibration mode.

Fluorescein-labeled HRP is immobilized onto three PSiO<sub>2</sub> nanostructures (oxidized at 400, 600, 800°C). The samples are studied by CLSM and the fluorescence intensity is calculated by image analysis of the CLSM data using the Imaris software. Figure S3 summarizes the mean fluorescence intensity values resulting from the fluorescein-labeled HRP and the photoluminescence (PL) of the PSiO<sub>2</sub> scaffolds. Both signal are observed to increase with oxidation temperature.

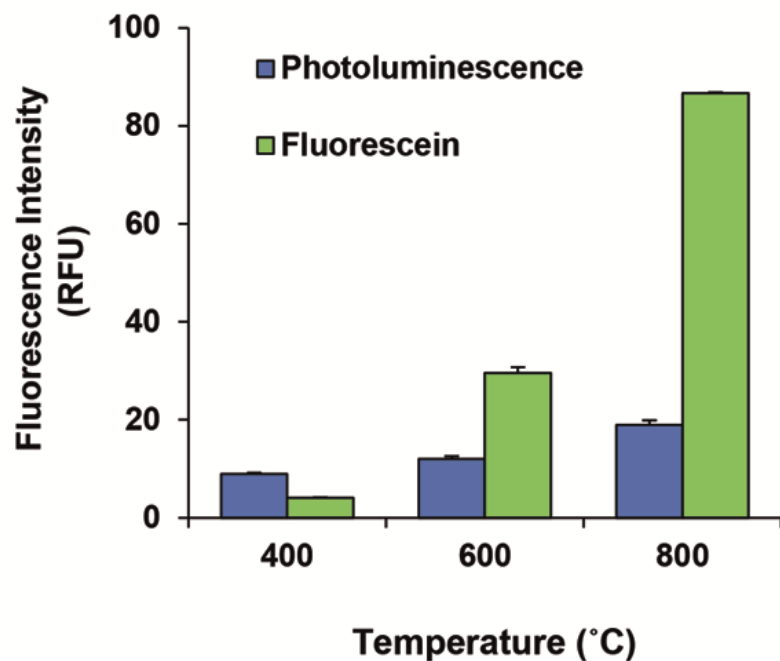

**Figure S3.** Fluorescence and photoluminescence intensity values obtained following fluorescein-HRP (FTC-HRP) immobilization onto PSiO<sub>2</sub> scaffolds oxidized at different temperatures.

Figure S4 summarize the results of optical stability experiments presented in Figures 6, S5, S6 and S7. The results are presented as the maximal rate of relative EOT change with time, calculated from the slopes of the relative EOT vs. time plots.

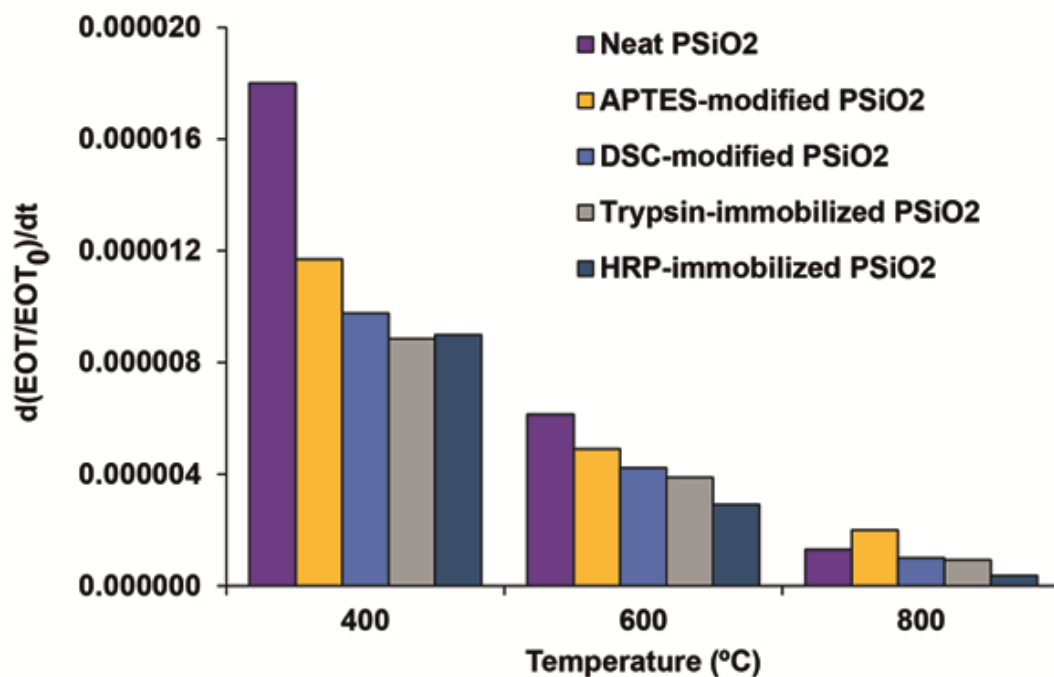

**Figure S4.** Maximal rate of relative EOT change with time of the neat PSiO<sub>2</sub>, APTES-modified PSiO<sub>2</sub>, DSC-modified PSiO<sub>2</sub> and enzyme-immobilized PSiO<sub>2</sub> (oxidized at three different temperatures 400, 600, 800°C) upon exposure to aqueous solution flow conditions. The nanostructures are continuously washed with 0.1 M HEPES buffer solution.

APTES-modified PSiO<sub>2</sub>, DSC-modified PSiO<sub>2</sub> and Trypsin-immobilized PSiO<sub>2</sub> are fixed in a flow cell setup and are exposed to an aqueous solution of HEPES buffer (pH 8), while their optical properties are monitored in real time. Figures S5, S6 and S7 depict the changes in the relative EOT as a function of time of these modified nanostructures.

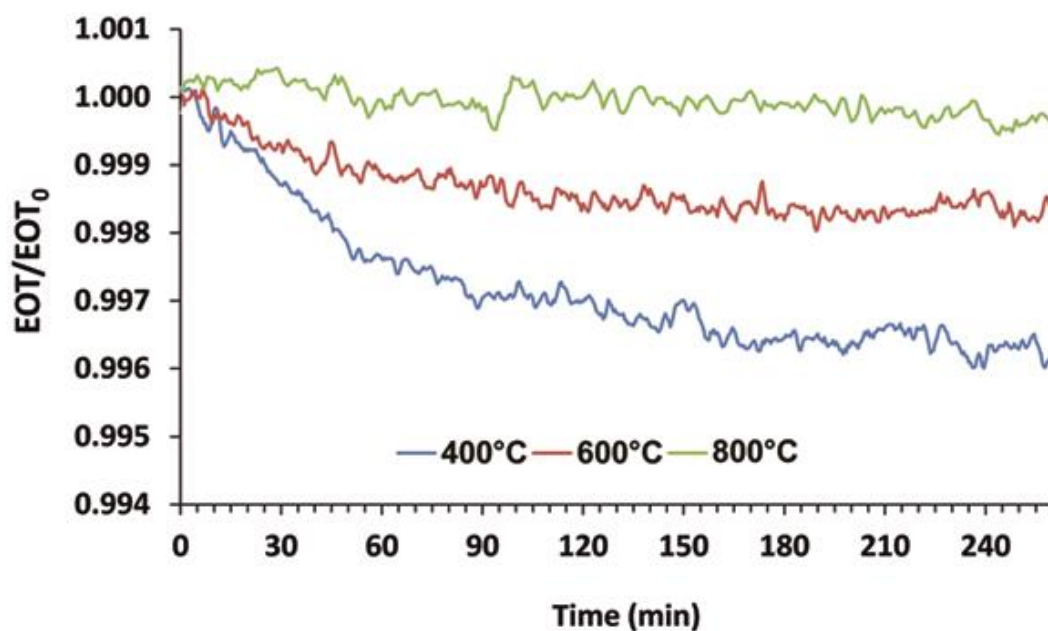

**Figure S5.** Optical response, expressed in terms of the relative EOT, of APTES-modified PSiO<sub>2</sub> (oxidized at three different temperatures 400, 600, 800°C) films vs. exposure time to aqueous solution flow conditions. The nanostructures are continuously washed with 0.1 M HEPES buffer solution (pH 8) at 0.5 mL min<sup>-1</sup>. The samples are fixed in a custom made cell, and the reflectivity spectra are recorded every 30 s.

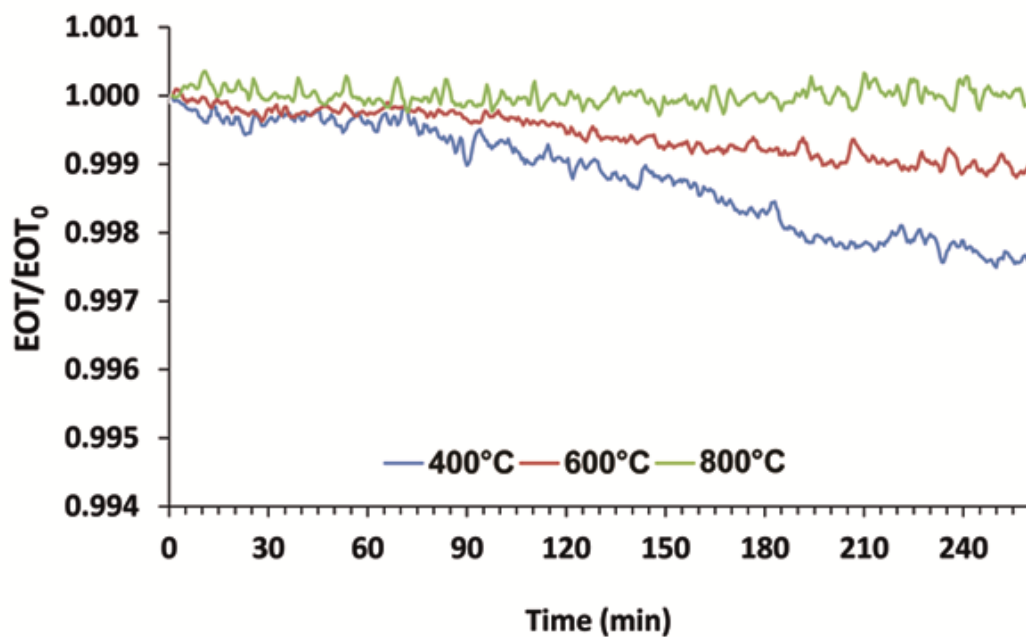

**Figure S6.** Optical response, expressed in terms of the relative EOT, of DSC-modified PSiO<sub>2</sub> (oxidized at three different temperatures 400, 600, 800°C) films vs. exposure time to aqueous solution flow conditions. The nanostructures are continuously washed with 0.1 M HEPES buffer solution (pH 8) at 0.5 mL min<sup>-1</sup>. The samples are fixed in a custom made cell, and the reflectivity spectra are recorded every 30 s.

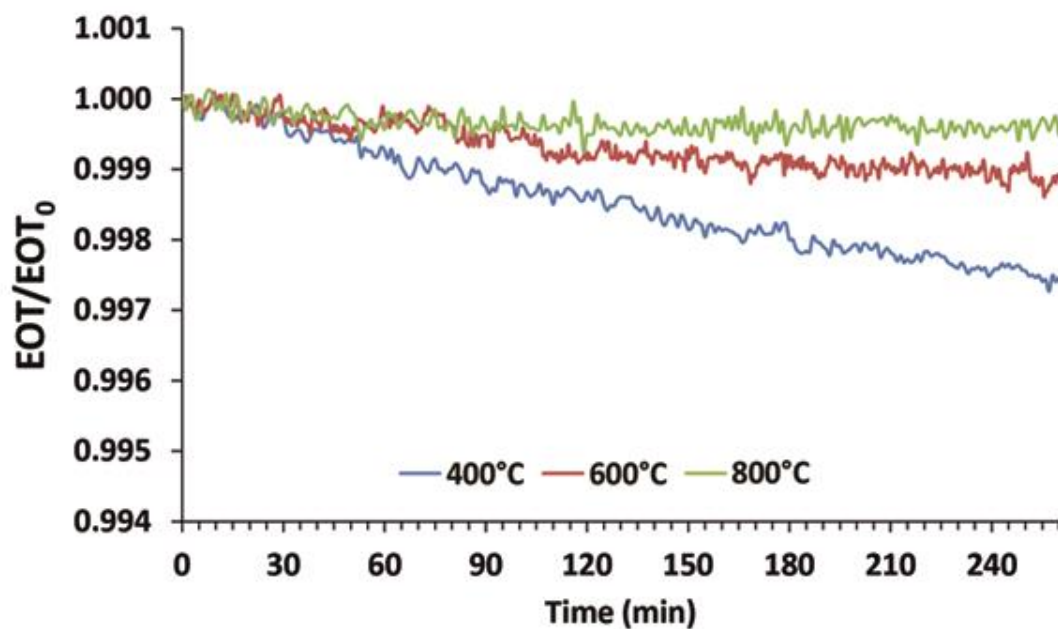

**Figure S7.** Optical response, expressed in terms of the relative EOT, of trypsin-immobilized PSiO<sub>2</sub> (oxidized at three different temperatures 400, 600, 800°C) films vs. exposure time to aqueous solution flow conditions. The nanostructures are continuously washed with 0.1 M HEPES buffer solution (pH 8) at 0.5 mL min<sup>-1</sup>. The samples are fixed in a custom made cell, and the reflectivity spectra are recorded every 30 s.
